# Supplementary material for: Addressing Personal Protective Equipment (PPE) Decontamination: Methylene Blue and Light Inactivates SARS-CoV-2 on N95 Respirators and Masks with Maintenance of Integrity and Fit
Source: bioRxiv or medRxiv preprint supplement (doi:10.1101/2020.12.11.20236919), 2020-12-12
Supplement: Supplementary file [file media-3.pdf]

**Table S2A: Integrity Results for Face Masks (MMs and CM)**

| Integrity Test                                                                                                                                                                                                                         | Decontamination method | WHO Type II mask (FW) |              |          | Halyard type IIR mask (FH) |              |          | Community mask (CM) |               |          |
|----------------------------------------------------------------------------------------------------------------------------------------------------------------------------------------------------------------------------------------|------------------------|-----------------------|--------------|----------|----------------------------|--------------|----------|---------------------|---------------|----------|
|                                                                                                                                                                                                                                        |                        | N                     | Mean (SD)    | p-value* | N                          | Mean (SD)    | p-value* | N                   | Mean (SD)     | p-value* |
| NaCl Filtration Efficiency (%) ( <i>Standard: ≥95% for respirators</i> )                                                                                                                                                               | Untreated              | 5                     | 76.32 (1.54) | ref      | 5                          | 85.78 (1.71) | ref      | 5                   | 33.92 (13.66) | ref      |
|                                                                                                                                                                                                                                        | MBL 5x                 | 5                     | 85.30 (0.89) | 0.012    | 5                          | 93.58 (0.68) | 0.012    | 5                   | 32.42 (1.91)  | 0.14     |
|                                                                                                                                                                                                                                        | DH 5x                  | 5                     | 80.70 (4.79) | 0.21     | 5                          | 86.94 (0.66) | 0.35     | 5                   | 46.94 (12.65) | 0.09     |
|                                                                                                                                                                                                                                        | VHP+O <sub>3</sub> 5x  | 5                     | 85.80 (1.48) | 0.012    | 5                          | 93.13 (0.48) | 0.012    | N/A                 | N/A           | N/A      |
| Bacterial Filtration Efficiency (%) ( <i>Standard: ≥98% for EN 14683 and 98≥% ASTM F2100</i> )                                                                                                                                         | Untreated              | 10                    | 99.38 (0.20) | ref      | 10                         | 99.72 (0.16) | ref      | 10                  | 87.59 (4.06)  | ref      |
|                                                                                                                                                                                                                                        | MBL 5x                 | 10                    | 99.40 (0.26) | 0.85     | 10                         | 99.74 (0.14) | 0.88     | 10                  | 90.88 (2.40)  | 0.04     |
|                                                                                                                                                                                                                                        | DH 5x                  | 10                    | 99.23 (0.14) | 0.07     | 10                         | 99.81 (0.10) | 0.18     | 10                  | 86.59 (2.21)  | 0.50     |
|                                                                                                                                                                                                                                        | VHP+O <sub>3</sub> 5x  | 5                     | 99.20 (0.16) | 0.10     | 5                          | 99.64 (0.13) | 0.31     | N/A                 | N/A           | N/A      |
| Breathing Resistance with NaCl Inhalation mmH <sub>2</sub> O ( <i>Standard: ≤35 mmH<sub>2</sub>O for respirators</i> )                                                                                                                 | Untreated              | 3                     | 9.37 (0.74)  | ref      | 3                          | 11.87 (2.05) | ref      | 3                   | 8.10 (1.42)   | ref      |
|                                                                                                                                                                                                                                        | MBL 5x                 | 3                     | 8.97 (0.81)  | 0.56     | 3                          | 9.50 (1.73)  | 0.20     | 3                   | 4.20 (0.00)   | 0.04     |
|                                                                                                                                                                                                                                        | DH 5x                  | 3                     | 8.93 (0.90)  | 0.55     | 3                          | 8.43 (1.91)  | 0.10     | 3                   | 3.43 (1.42)   | 0.02     |
|                                                                                                                                                                                                                                        | VHP+O <sub>3</sub> 5x  | 3                     | 8.43 (1.50)  | 0.39     | 3                          | 10.33 (0.81) | 0.29     | N/A                 | N/A           | N/A      |
| Breathing Resistance with NaCl Exhalation mmH <sub>2</sub> O ( <i>Standard: ≤25 mm H<sub>2</sub>O for respirators</i> )                                                                                                                | Untreated              | 3                     | 3.30 (0.17)  | ref      | 3                          | 4.13 (0.15)  | ref      | 3                   | 4.70 (0.69)   | ref      |
|                                                                                                                                                                                                                                        | MBL 5x                 | 3                     | 3.97 (0.06)  | 0.003    | 3                          | 5.33 (0.12)  | 0.0004   | 3                   | 3.60 (0.10)   | 0.11     |
|                                                                                                                                                                                                                                        | DH 5x                  | 3                     | 3.83 (0.25)  | 0.04     | 3                          | 4.80 (0.40)  | 0.054    | 3                   | 3.50 (0.61)   | 0.09     |
|                                                                                                                                                                                                                                        | VHP+O <sub>3</sub> 5x  | 3                     | 4.17 (0.38)  | 0.02     | 3                          | 5.60 (0.26)  | 0.001    | N/A                 | N/A           | N/A      |
| Pressure Drop with Bacterial Filtration Efficiency ( <i>Standard: EN 14683:2019 Annex C &lt;40 Pa/cm<sup>2</sup> for Type II and ASTM F2100 spec &lt;6.0 mm H<sub>2</sub>O/cm<sup>2</sup> [58.83 Pa/cm<sup>2</sup> for Type IIR]</i> ) | Untreated              | 10                    | 29.09 (1.76) | ref      | 10                         | 40.98 (1.03) | ref      | 10                  | 48.99 (2.17)  | ref      |
|                                                                                                                                                                                                                                        | MBL 5x                 | 10                    | 29.09 (1.66) | 0.99     | 10                         | 41.16 (2.19) | 0.82     | 10                  | 51.71 (4.41)  | 0.10     |
|                                                                                                                                                                                                                                        | DH 5x                  | 10                    | 27.78 (1.69) | 0.10     | 10                         | 40.03 (2.54) | 0.29     | 10                  | 51.22 (3.98)  | 0.14     |
|                                                                                                                                                                                                                                        | VHP+O <sub>3</sub> 5x  | 5                     | 32.30 (1.70) | 0.005    | 5                          | 44.48 (3.30) | 0.08     | N/A                 | N/A           | N/A      |
| Sheffield dummy fit inhalation 28.3 l/m <i>No min requirements for face masks (Modified version EN 149 7.16 was used; Maximum permitted resistance (mbar), inhalation: 0.7 (30 l/min); 2.4 (95 l/min) ) exhalation (160 l/min 3.0)</i> | Untreated              | 3                     | -0.18 (0.01) | ref      | 3                          | -0.16 (0.02) | ref      | 3                   | -0.15 (0.02)  | ref      |
|                                                                                                                                                                                                                                        | MBL 5x                 | 3                     | -0.19 (0.01) | 0.26     | 3                          | -0.16 (0.01) | 0.82     | 3                   | -0.15 (0.02)  | 0.80     |
|                                                                                                                                                                                                                                        | DH 5x                  | 3                     | -0.17 (0.01) | 0.99     | 3                          | -0.14 (0.01) | 0.48     | 3                   | -0.17 (0.02)  | 0.41     |
|                                                                                                                                                                                                                                        | VHP+O <sub>3</sub> 5x  | 3                     | -0.18 (0.02) | 0.99     | 3                          | -0.15 (0.01) | 0.64     | N/A                 | N/A           | N/A      |
| Sheffield dummy fit inhalation 85 l/m                                                                                                                                                                                                  | Untreated              | 3                     | -0.54 (0.06) | ref      | 3                          | -0.43 (0.05) | ref      | 3                   | -0.49 (0.03)  | ref      |
|                                                                                                                                                                                                                                        | MBL 5x                 | 3                     | -0.61 (0.04) | 0.17     | 3                          | -0.47 (0.01) | 0.31     | 3                   | -0.48 (0.03)  | 0.72     |
|                                                                                                                                                                                                                                        | DH 5x                  | 3                     | -0.55 (0.02) | 0.78     | 3                          | -0.46 (0.02) | 0.40     | 3                   | -0.56 (0.08)  | 0.20     |
|                                                                                                                                                                                                                                        | VHP+O <sub>3</sub> 5x  | 3                     | -0.56 (0.07) | 0.72     | 3                          | -0.44 (0.03) | 0.66     | N/A                 | N/A           | N/A      |

|                                                                                                                                                               |                       |     |             |         |     |             |         |     |                |         |
|---------------------------------------------------------------------------------------------------------------------------------------------------------------|-----------------------|-----|-------------|---------|-----|-------------|---------|-----|----------------|---------|
| Sheffield dummy fit exhalation 85 l/m                                                                                                                         | Untreated             | 3   | 0.51 (0.05) | ref     | 3   | 0.37 (0.04) | ref     | 3   | 0.47 (0.03)    | ref     |
|                                                                                                                                                               | MBL 5x                | 3   | 0.55 (0.03) | 0.22    | 3   | 0.42 (0.01) | 0.13    | 3   | 0.47 (0.04)    | 0.92    |
|                                                                                                                                                               | DH 5x                 | 3   | 0.51 (0.01) | 0.82    | 3   | 0.39 (0.03) | 0.51    | 3   | 0.53 (0.05)    | 0.16    |
|                                                                                                                                                               | VHP+O <sub>3</sub> 5x | 3   | 0.52 (0.03) | 0.63    | 3   | 0.40 (0.02) | 0.27    | N/A | N/A            | N/A     |
| Sheffield dummy fit exhalation 160 l/m                                                                                                                        | Untreated             | 3   | 0.97 (0.02) | ref     | 3   | 0.71 (0.06) | ref     | 3   | 0.92 (0.05)    | ref     |
|                                                                                                                                                               | MBL 5x                | 3   | 1.05 (0.04) | 0.37    | 3   | 0.81 (0.02) | 0.07    | 3   | 0.95 (0.09)    | 0.63    |
|                                                                                                                                                               | DH 5x                 | 3   | 0.97 (0.02) | 0.85    | 3   | 0.73 (0.03) | 0.70    | 3   | 1.06 (0.13)    | 0.16    |
|                                                                                                                                                               | VHP+O <sub>3</sub> 5x | 3   | 1.02 (0.08) | 0.68    | 3   | 0.76 (0.04) | 0.33    | N/A | N/A            | N/A     |
| Fluid Penetration inside surface (% pass) <sup>1</sup> (no Standard)                                                                                          | Untreated             | 10  | 60%         | ref     | 10  | 90%         | ref     | 10  | 30%            | ref     |
|                                                                                                                                                               | MBL 5x                | 10  | 80%         | 0.63    | 10  | 100%        | 0.99    | 10  | 40%            | 0.99    |
|                                                                                                                                                               | DH 5x                 | 10  | 50%         | 0.99    | 10  | 90%         | 0.99    | 10  | 50%            | 0.65    |
|                                                                                                                                                               | VHP+O <sub>3</sub> 5x | 5   | 40%         | 0.61    | 5   | 100%        | 0.99    | N/A | N/A            | N/A     |
| Fluid Penetration outside surface (% pass) <sup>6</sup> (Standard: $\geq 90.625\%$ should pass: 29 out of 32 samples according to ASTM F2100)                 | Untreated             | 15  | 33.3%       | ref     | 15  | 40%         | ref     | 15  | 93.3%          | ref     |
|                                                                                                                                                               | MBL 5x                | 10  | 50%         | 0.44    | 10  | 40%         | 0.99    | 10  | 60%            | 0.12    |
|                                                                                                                                                               | DH 5x                 | 10  | 50%         | 0.44    | 10  | 50%         | 0.70    | 10  | 70%            | 0.27    |
|                                                                                                                                                               | VHP+O <sub>3</sub> 5x | 5   | 100%        | 0.03    | 5   | 100%        | 0.04    | N/A | N/A            | N/A     |
| Human fit (PortaCount) Overall Fit Factor (No minimum requirements for face masks. Standard for Respirators: Fit factor $\geq 100$ ; OSHA 29 CFR 1910.134(f)) | Untreated             | 5   | 3.81 (0.82) | ref     | 5   | 3.72 (1.00) | ref     | 5   | 3.34 (0.78)    | ref     |
|                                                                                                                                                               | MBL 5x                | 5   | 4.11 (0.83) | 0.58    | 5   | 3.54 (0.67) | 0.99    | 5   | 2.94 (1.01)    | 0.40    |
|                                                                                                                                                               | DH 5x                 | 5   | 3.63 (0.87) | 74      | 5   | 3.65 (1.72) | 0.53    | 5   | 2.76 (0.67)    | 0.30    |
|                                                                                                                                                               | VHP+O <sub>3</sub> 5x | 5   | 2.41 (0.26) | 0.02    | 5   | 2.17 (0.39) | 0.012   | N/A | N/A            | N/A     |
| Tensile strength force (Newtons) (no Standard)                                                                                                                | Untreated             | N/A | N/A         | N/A     | N/A | N/A         | N/A     | 6   | 194.35 (3.58)  | ref     |
|                                                                                                                                                               | MBL 5x                | N/A | N/A         | N/A     | N/A | N/A         | N/A     | 15  | 170.7 (20.53)  | 0.006   |
|                                                                                                                                                               | DH 5x                 | N/A | N/A         | N/A     | N/A | N/A         | N/A     | 15  | 206.41 (25.62) | 0.08    |
| Tensile strength: Elongation (%) (no Standard)                                                                                                                | Untreated             | N/A | N/A         | N/A     | N/A | N/A         | N/A     | 6   | 11.13 (0.21)   | ref     |
|                                                                                                                                                               | MBL 5x                | N/A | N/A         | N/A     | N/A | N/A         | N/A     | 15  | 30.35 (5.78)   | <0.0001 |
|                                                                                                                                                               | DH 5x                 | N/A | N/A         | N/A     | N/A | N/A         | N/A     | 15  | 15.33 (9.87)   | 0.90    |
| Tensile strength: Maximum load (190% strain) (no Standard)                                                                                                    | Untreated             | 12  | 0.44 (0.05) | ref     | 12  | 0.44 (0.04) | ref     | N/A | N/A            | N/A     |
|                                                                                                                                                               | MBL 5x                | 25  | 0.46 (0.03) | 0.21    | 25  | 0.39 (0.04) | 0.001   | N/A | N/A            | N/A     |
|                                                                                                                                                               | DH 5x                 | 21  | 0.41 (0.03) | 0.08    | 21  | 0.34 (0.05) | 0.0001  | N/A | N/A            | N/A     |
|                                                                                                                                                               | VHP+O <sub>3</sub> 5x | 10  | 0.34 (0.03) | <0.0001 | 10  | 0.35 (0.03) | <0.0001 | N/A | N/A            | N/A     |

\* Difference between results from decontaminated face masks compared to untreated masks (Student's t test, Mann-Whitney U test or Fisher's exact test). Ref = reference category

**Table 2B: Integrity Testing Results for Respirators (FFRs)**

| Integrity Test                                                                                                                                                                                         | Decontamination method | Halyard Duck Bill Respirator (RH) |              |         | 3M half sphere Respirator (RM) |              |         | 3M 1870+ panel Respirator (R3) |              |         |
|--------------------------------------------------------------------------------------------------------------------------------------------------------------------------------------------------------|------------------------|-----------------------------------|--------------|---------|--------------------------------|--------------|---------|--------------------------------|--------------|---------|
|                                                                                                                                                                                                        |                        | N                                 | Mean (SD)    | p-value | N                              | Mean (SD)    | p-value | N                              | Mean (SD)    | p-value |
| NaCl filtration efficiency (%) ( $\geq 95\%$ )                                                                                                                                                         | Untreated              | 4                                 | 99.22 (0.17) | ref     | 4                              | 98.73 (0.65) | ref     | 2                              | 99.13 (0.41) | ref     |
|                                                                                                                                                                                                        | MBL 5x                 | 7                                 | 98.98 (0.78) | 0.78    | 7                              | 98.87 (0.24) | 0.92    | 7                              | 99.78 (0.09) | 0.057   |
|                                                                                                                                                                                                        | DH 5x                  | 7                                 | 99.22 (0.28) | 0.78    | 7                              | 98.79 (0.24) | 0.78    | 7                              | 99.39 (0.49) | 0.46    |
|                                                                                                                                                                                                        | VHP+O <sub>3</sub> 5x  | 7                                 | 98.92 (0.58) | 0.78    | 7                              | 98.47 (0.40) | 0.22    | 7                              | 99.72 (0.15) | 0.057   |
| NaCl filter efficiency (% after loading)                                                                                                                                                               | Untreated              | 3                                 | 99.07 (0.33) | ref     | 3                              | 98.96 (0.27) | ref     | 5                              | 98.57 (1.75) | ref     |
|                                                                                                                                                                                                        | MBL 5x                 | 3                                 | 98.72 (0.53) | 0.39    | 3                              | 99.21 (0.13) | 0.22    | 3                              | 98.92 (1.34) | 0.99    |
|                                                                                                                                                                                                        | DH 5x                  | 3                                 | 98.77 (0.50) | 0.44    | 3                              | 98.65 (0.30) | 0.25    | 3                              | 99.23 (0.78) | 0.99    |
|                                                                                                                                                                                                        | VHP+O <sub>3</sub> 5x  | 3                                 | 99.12 (0.26) | 0.82    | 3                              | 98.75 (0.22) | 0.37    | 3                              | 99.56 (0.16) | 0.99    |
| Breathing Resistance with NaCl Inhalation <sup>1</sup> ( $\leq 35$ mmH <sub>2</sub> O)                                                                                                                 | Untreated              | 3                                 | 8.81 (0.14)  | ref     | 3                              | 7.87 (0.00)  | ref     | 5                              | 5.33 (0.78)  | ref     |
|                                                                                                                                                                                                        | MBL 5x                 | 3                                 | 8.38 (0.00)  | 0.04    | 3                              | 7.20 (0.39)  | 0.06    | 3                              | 6.86 (0.26)  | 0.02    |
|                                                                                                                                                                                                        | DH 5x                  | 3                                 | 8.30 (0.14)  | 0.012   | 3                              | 6.69 (0.15)  | 0.06    | 3                              | 6.26 (0.39)  | 0.11    |
|                                                                                                                                                                                                        | VHP+O <sub>3</sub> 5x  | 3                                 | 8.21 (0.39)  | 0.07    | 3                              | 6.77 (0.15)  | 0.06    | 3                              | 6.35 (0.44)  | 0.09    |
| Breathing Resistance with NaCl Exhalation <sup>2</sup> ( $\leq 25$ mmH <sub>2</sub> O)                                                                                                                 | Untreated              | 3                                 | 8.89 (0.00)  | ref     | 3                              | 7.79 (0.14)  | ref     | 5                              | 4.88 (0.58)  | ref     |
|                                                                                                                                                                                                        | MBL 5x                 | 3                                 | 8.38 (0.00)  | <0.0001 | 3                              | 7.03 (0.39)  | 0.03    | 3                              | 6.10 (0.26)  | 0.015   |
|                                                                                                                                                                                                        | DH 5x                  | 3                                 | 8.21 (0.14)  | 0.015   | 3                              | 6.77 (0.29)  | 0.006   | 3                              | 6.18 (0.39)  | 0.014   |
|                                                                                                                                                                                                        | VHP+O <sub>3</sub> 5x  | 3                                 | 8.72 (0.39)  | 0.53    | 3                              | 6.86 (0.00)  | 0.008   | 3                              | 5.76 (0.29)  | 0.053   |
| Sheffield dummy fit inhalation 28.3 l/m ( <i>Modified version EN 149 7.16 was used; Maximum permitted resistance (mbar), inhalation: 0.7 (30 l/min); 2.4 (95 l/min) ) exhalation (160 l/min 3.0)</i> ) | Untreated              | 3                                 | -0.27 (0.01) | ref     | 3                              | -0.26 (0.02) | ref     | 3                              | -0.22 (0.01) | ref     |
|                                                                                                                                                                                                        | MBL 5x                 | 3                                 | -0.29 (0.02) | 0.20    | 3                              | -0.26 (0.01) | 0.99    | 3                              | -0.23 (0.01) | 0.52    |
|                                                                                                                                                                                                        | DH 5x                  | 3                                 | -0.26 (0.02) | 0.48    | 3                              | -0.21 (0.01) | 0.007   | 3                              | -0.25 (0.01) | 0.008   |
|                                                                                                                                                                                                        | VHP+O <sub>3</sub> 5x  | 3                                 | -0.29 (0.02) | 0.28    | 3                              | -0.25 (0.02) | 0.37    | 3                              | -0.22 (0.01) | 0.23    |
| Sheffield dummy fit inhalation 85 l/m                                                                                                                                                                  | Untreated              | 3                                 | -0.85 (0.03) | ref     | 3                              | -0.79 (0.05) | ref     | 3                              | -0.66 (0.03) | ref     |
|                                                                                                                                                                                                        | MBL 5x                 | 3                                 | -0.88 (0.04) | 0.36    | 3                              | -0.78 (0.04) | 0.79    | 3                              | -0.68 (0.03) | 0.41    |

|                                                                                                                                    |                       |    |                |      |    |                |       |    |                |       |
|------------------------------------------------------------------------------------------------------------------------------------|-----------------------|----|----------------|------|----|----------------|-------|----|----------------|-------|
|                                                                                                                                    | DH 5x                 | 3  | -0.80 (0.06)   | 0.27 | 3  | -0.61 (0.01)   | 0.004 | 3  | -0.75 (0.03)   | 0.014 |
|                                                                                                                                    | VHP+O <sub>3</sub> 5x | 3  | -0.87 (0.04)   | 0.58 | 3  | -0.74 (0.04)   | 0.27  | 3  | -0.65 (0.01)   | 0.57  |
| Sheffield dummy fit exhalation 85 l/m                                                                                              | Untreated             | 3  | 0.80 (0.03)    | ref  | 3  | 0.74 (0.06)    | ref   | 3  | 0.63 (0.04)    | ref   |
|                                                                                                                                    | MBL 5x                | 3  | 0.83 (0.03)    | 0.26 | 3  | 0.75 (0.03)    | 0.93  | 3  | 0.66 (0.02)    | 0.48  |
|                                                                                                                                    | DH 5x                 | 3  | 0.78 (0.02)    | 0.30 | 3  | 0.59 (0.01)    | 0.04  | 3  | 0.73 (0.01)    | 0.008 |
|                                                                                                                                    | VHP+O <sub>3</sub> 5x | 3  | 0.84 (0.04)    | 0.26 | 3  | 0.72 (0.03)    | 0.61  | 3  | 0.62 (0.01)    | 0.88  |
| Sheffield dummy fit exhalation 160 l/m                                                                                             | Untreated             | 3  | 1.62 (0.05)    | ref  | 3  | 1.49 (0.12)    | ref   | 3  | 1.24 (0.03)    | ref   |
|                                                                                                                                    | MBL 5x                | 3  | 1.66 (0.01)    | 0.19 | 3  | 1.46 (0.05)    | 0.99  | 3  | 1.28 (0.05)    | 0.38  |
|                                                                                                                                    | DH 5x                 | 3  | 1.61 (0.02)    | 0.92 | 3  | 1.15 (0.01)    | 0.08  | 3  | 1.43 (0.03)    | 0.08  |
|                                                                                                                                    | VHP+O <sub>3</sub> 5x | 3  | 1.69 (0.05)    | 0.11 | 3  | 1.46 (0.02)    | 0.99  | 3  | 1.22 (0.02)    | 0.38  |
| Human fit (PortaCount) Overall Fit Factor<br>(Standard: Fit factor $\geq 100$ ; OSHA 29 CFR 1910.134(f))                           | Untreated             | 10 | 150.13 (54.95) | ref  | 10 | 149.53 (51.79) | ref   | 10 | 175.70 (36.19) | ref   |
|                                                                                                                                    | MBL 5x                | 10 | 170.28 (48.76) | 0.39 | 10 | 142.59 (51.26) | 0.56  | 10 | 165.51 (50.53) | 0.49  |
|                                                                                                                                    | DH 5x                 | 10 | 173.82 (37.93) | 0.31 | 10 | 147.23 (46.95) | 0.56  | 9  | 184.42 (45.00) | 0.46  |
|                                                                                                                                    | VHP+O <sub>3</sub> 5x | 10 | 91.67 (82.93)  | 0.14 | 10 | 72.30 (67.33)  | 0.011 | 10 | 159.41 (65.23) | 0.77  |
| Manikin (Advanced Headform) Overall Fit Factor<br>(Standard: $\geq 100$ per OSHA 1910.134 (f)(7) through quantitative fit testing) | Untreated             | 3  | 188.00 (20.78) | ref  | 3  | 200.00 (0.00)  | ref   | 3  | 195.67 (7.51)  | ref   |
|                                                                                                                                    | MBL 5x                | 2  | 186.50 (19.09) | 0.99 | 3  | 188.00 (20.78) | 0.51  | 3  | 159.33 (13.01) | 0.08  |
|                                                                                                                                    | DH 5x                 | 3  | 163.00 (32.91) | 0.35 | 3  | 200.00 (0.00)  | 0.99  | 3  | 165.67 (45.08) | 0.18  |
|                                                                                                                                    | VHP+O <sub>3</sub> 5x | 3  | 186.00 (24.25) | 0.99 | 3  | 127.67 (20.78) | 0.06  | 3  | 195.67 (7.51)  | 0.99  |
| Tensile strength: Force (Newtons) in top strap (no Standard)                                                                       | Untreated             | 4  | 2.41 (0.03)    | ref  | 4  | 2.83 (0.22)    | ref   | 2  | 1.71 (0.1)     | ref   |
|                                                                                                                                    | MBL 5x                | 5  | 2.37 (0.02)    | 0.39 | 5  | 2.73 (0.10)    | 0.71  | 5  | 1.77 (0.17)    | 0.85  |
|                                                                                                                                    | DH 5x                 | 5  | 2.31 (0.01)    | 0.02 | 5  | 2.71 (0.04)    | 0.90  | 5  | 1.87 (0.03)    | 0.08  |
|                                                                                                                                    | VHP+O <sub>3</sub> 5x | 5  | 1.99 (0.07)    | 0.02 | 5  | 3.61 (0.30)    | 0.02  | 5  | 1.92 (0.04)    | 0.08  |
| Tensile strength: Force (Newtons) in bottom strap (no Standard)                                                                    | Untreated             | 4  | 2.46 (0.04)    | ref  | 4  | 2.71 (0.20)    | ref   | 2  | 1.71 (0.15)    | ref   |
|                                                                                                                                    | MBL 5x                | 5  | 2.42 (0.04)    | 0.39 | 5  | 2.76 (0.10)    | 0.54  | 5  | 1.96 (0.06)    | 0.02  |
|                                                                                                                                    | DH 5x                 | 5  | 2.33 (0.03)    | 0.02 | 5  | 2.67 (0.06)    | 0.99  | 5  | 1.73 (0.03)    | 0.85  |
|                                                                                                                                    | VHP+O <sub>3</sub> 5x | 5  | 2.00 (0.04)    | 0.02 | 5  | 3.62 (0.23)    | 0.02  | 5  | 1.91 (0.08)    | 0.052 |

\* Difference between results from decontaminated face masks compared to untreated masks (Student's t test or Mann-Whitney U test). Ref = reference category
